# Supplementary material for: Cellular signatures in human blood track bone mineral density in postmenopausal women
Source: JCI journal article supplement (doi:10.1172/jci.insight.178977), 2024-11-21

**Fig 1B. Unedited blot and gel images**

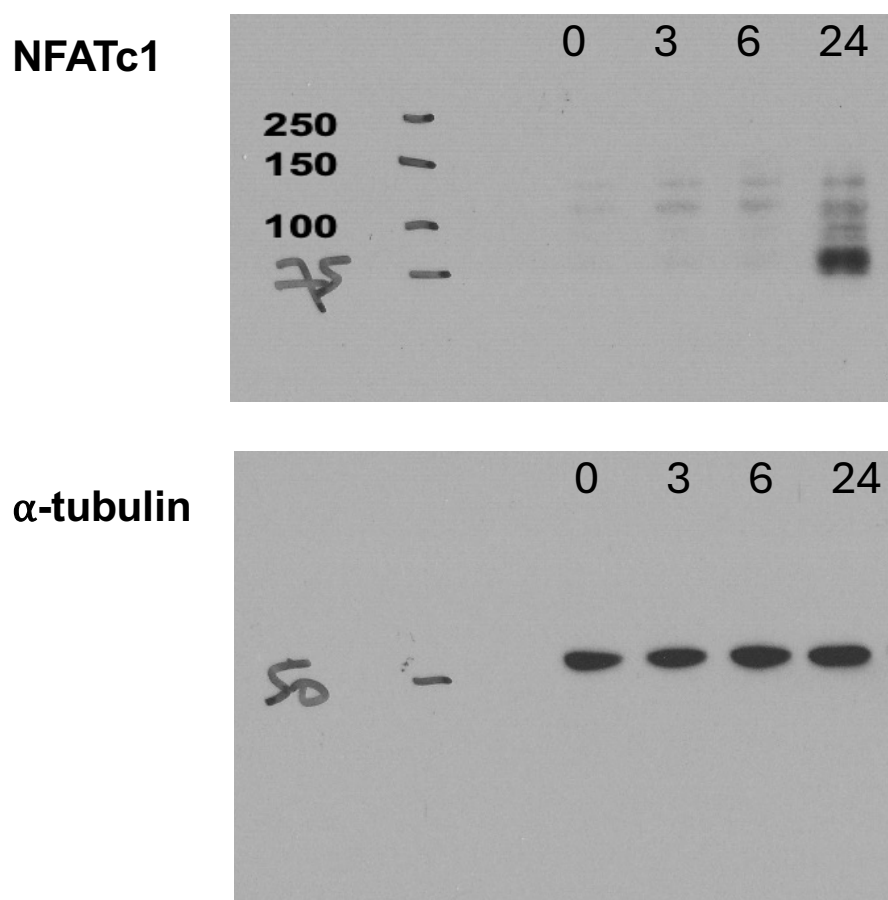

Supplement: sd2 [file 2]
